# Supplementary material for: Rare Genomic Structural Variants in Complex Disease: Lessons from the Replication of Associations with Obesity
Source: PubMed Central journal article supplement (PMC3595275; doi:10.1371/journal.pone.0058048), 2013-03-12

**Supplementary Figure S1. Linkage disequilibrium in the chromosome 16p11.2 region.** SNP linkage disequilibrium data (CEU) for chromosome 16p11.2 was downloaded from HapMap release 3 version R2 and displayed using Haploview version 4.2 using the standard colour scheme. Solid bars show the locations of the obesity-associated 220kb and 593kb deletions. There is no identifiable linkage disequilibrium between the two regions.

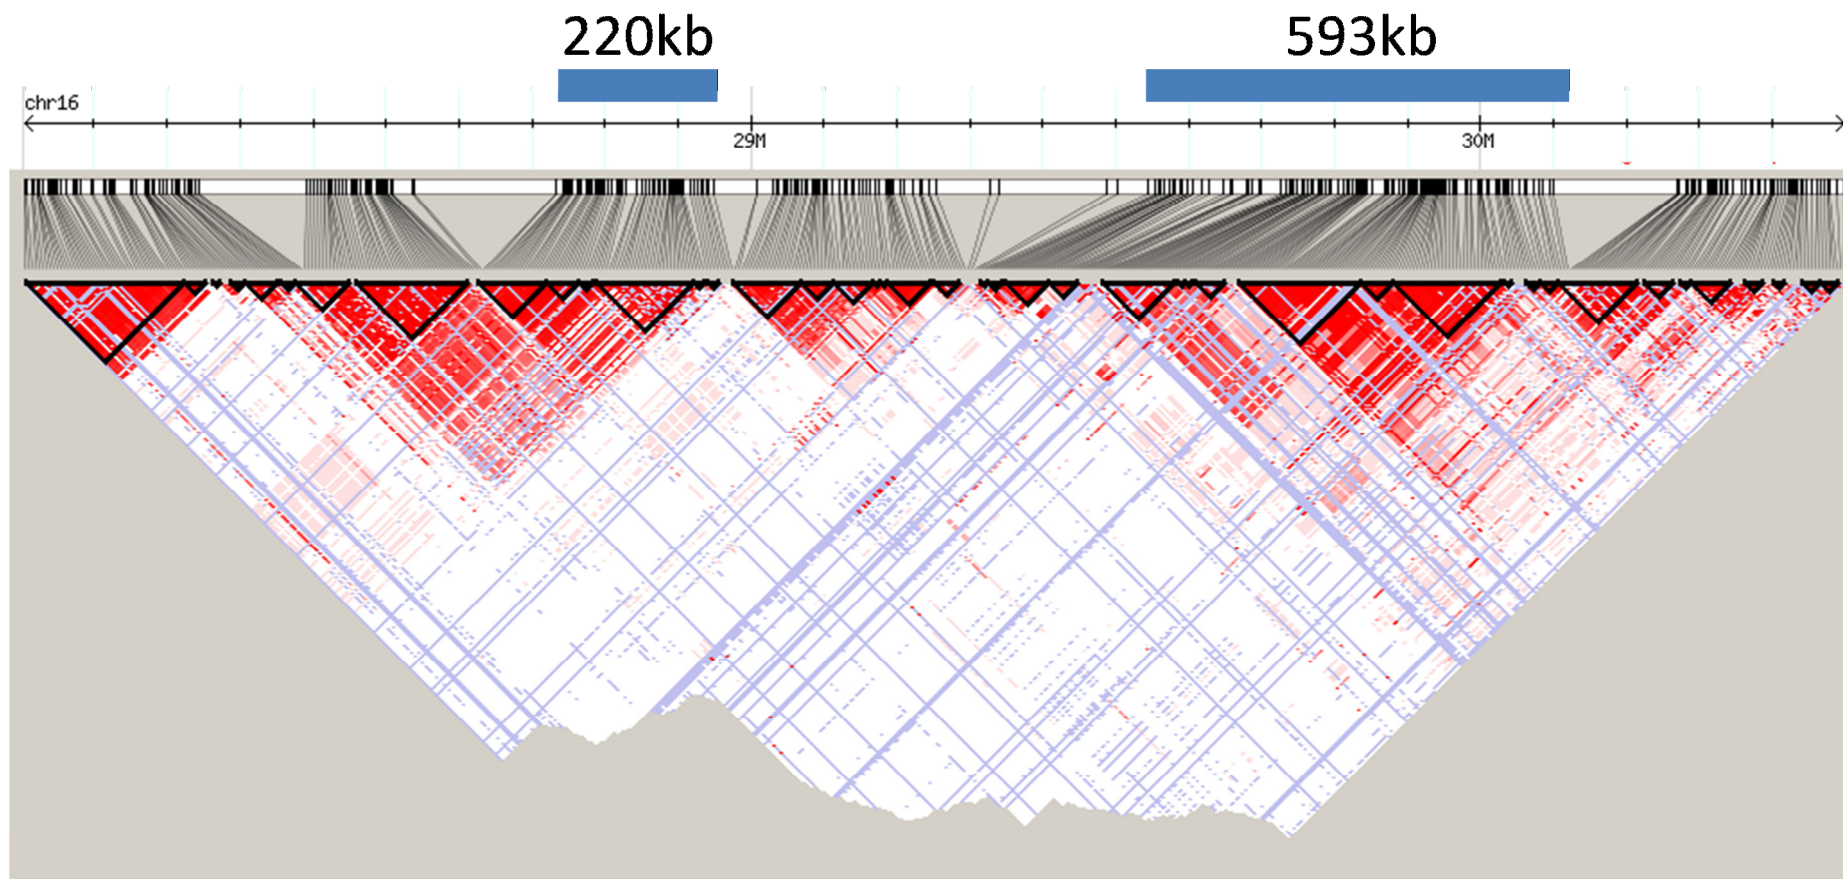

Supplement: pone.0058048.s001.pdf [file pone.0058048.s001.pdf]
