# Supplementary material for: Rare Genomic Structural Variants in Complex Disease: Lessons from the Replication of Associations with Obesity
Source: PubMed Central journal article supplement (PMC3595275; doi:10.1371/journal.pone.0058048), 2013-03-12

**Supplementary Figure S4. Impact of GSV call inaccuracy on type I error rate.** For a GSV with underlying population carrier frequency 0.2%, the frequency distributions for the number of GSV calls in cohorts of 1000 were determined according to the Poisson distribution ( $\lambda=2$ ) or the Negative Binomial distribution ( $r=4, k=\lambda/(\lambda+r)$ ). The marked areas indicate the GSV call frequencies in the 2 cohorts that result in type I errors for a 2-tailed test at  $\alpha=0.05$ , determined according to Fisher's exact test.

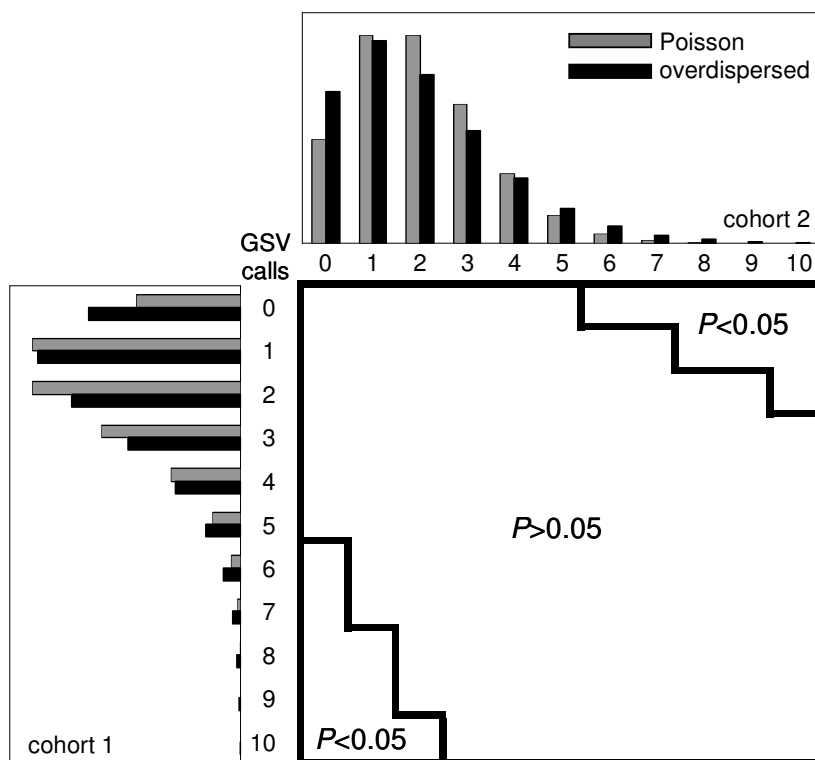

Supplement: pone.0058048.s004.pdf [file pone.0058048.s004.pdf]
