# Supplementary material for: Rare Genomic Structural Variants in Complex Disease: Lessons from the Replication of Associations with Obesity
Source: PubMed Central journal article supplement (PMC3595275; doi:10.1371/journal.pone.0058048), 2013-03-12
Supplement: pone.0058048.s005.pdf [file pone.0058048.s005.pdf]

**Supplementary Table S1. Frequency of reciprocal GSVs.** Each cohort was analysed for the presence of GSVs reciprocal to those previously reported (i.e. deletion instead of duplication and *vice versa*), using the same methodology as for the data shown in Table 1.

|                                                    | child obesity case-control |       | adult obesity case-control |       | Population cohort (NFBC1966) |             |       |
|----------------------------------------------------|----------------------------|-------|----------------------------|-------|------------------------------|-------------|-------|
|                                                    | non-obese                  | obese | non-obese                  | obese | normal                       | over-weight | obese |
| Total samples                                      | 557                        | 645   | 843                        | 701   | 3126                         | 1617        | 470   |
| <i>Identified in subjects with extreme obesity</i> |                            |       |                            |       |                              |             |       |
| chr3:89,250,592–89,319,536                         | 0                          | 0     | 1                          | 0     | 5                            | 3           | 2     |
| chr6:52,875,284–52,892,054                         | 0                          | 0     | 0                          | 0     | 0                            | 1           | 0     |
| chr8:143,268,033–143,634,461                       | 0                          | 0     | 0                          | 0     | 2                            | 0           | 0     |
| chr10:541,873–818,440                              | 0                          | 0     | 0                          | 0     | 0                            | 0           | 0     |
| chr11:72,013,333–72,089,312                        | 0                          | 0     | 2                          | 0     | 0                            | 0           | 0     |
| chr11:105,716,030–106,419,349                      | 0                          | 0     | 0                          | 0     | 0                            | 0           | 0     |
| chr15:28,700,879–30,231,488                        | 0                          | 0     | 0                          | 0     | 0                            | 0           | 0     |
| chr16:28,731,428–28,951,376                        | 1                          | 0     | 1                          | 0     | 1                            | 0           | 2     |
| chr17:2,224,814–2,256,880                          | 0                          | 0     | 1                          | 0     | 1                            | 1           | 1     |
| chr22:49,246,176–49,313,898                        | 0                          | 0     | 0                          | 1     | 0                            | 2           | 1     |
| <i>Identified in subjects with common obesity</i>  |                            |       |                            |       |                              |             |       |
| chr3:104,059,109–104,092,618                       | 0                          | 0     | 0                          | 1     | 4                            | 0           | 1     |
| chr5:53,467,427–53,480,255                         | 0                          | 0     | 0                          | 0     | 1                            | 0           | 0     |
| chr5:77,039,051–77,076,628                         | 0                          | 0     | 0                          | 0     | 0                            | 0           | 0     |
| chr5:83,835,179–83,874,339                         | 0                          | 0     | 0                          | 0     | 2                            | 1           | 1     |
| chr7:20,708,193–20,711,088                         | 4                          | 3     | 0                          | 0     | 4                            | 3           | 1     |
| chr7:113,843,696–113,859,679                       | 1                          | 0     | 4                          | 0     | 0                            | 0           | 0     |
| chr17:49,444,406–49,449,022                        | 0                          | 0     | 1                          | 0     | 3                            | 1           | 0     |
| chr19:10,489,548–10,512,171                        | 0                          | 0     | 0                          | 0     | 0                            | 0           | 0     |
